# Supplementary material for: Macular Neovascularization Subtype Determines Visual Consequences of Early Fibro-atrophic Remodelling in Neovascular AMD: PRECISE Study Report 11
Source: Research Square preprint supplement (doi:10.21203/rs.3.rs-8575526/v1), 2026-02-03
Supplement: Supplementary file 1 [file 15a046eb04780b14ef94fc30.docx]

|  | Overall (N=2028) | No HTM at Visit 4 (N=518) | HTM at Visit 4  (N=1510) | HTM vs No HTM  at Visit 4 |
| --- | --- | --- | --- | --- |
| **HTM at Baseline** |  |  |  |  |
| No | 1598 (78.8%) | 483 (93.2%) | 1115 (73.8%) | <0.001 |
| Yes | 430 (21.2%) | 35 (6.8%) | 395 (26.2%) |  |
| **BCVA at Baseline** |  |  |  |  |
| Mean (SD) | 58 (15) | 63 (12) | 56 (15) | <0.001 |
| Median (IQR) | 60 (21) | 65 (14) | 58 (22) |  |
| **BCVA at Visit 4** |  |  |  |  |
| Mean (SD) | 63 (15) | 68 (11) | 61 (16) | <0.001 |
| Median (IQR) | 66 (19) | 70 (12) | 65 (21) |  |
| **PED at Baseline** |  |  |  |  |
| Fibrovascular PED | 1525 (75.2%) | 412 (79.5%) | 1113 (73.7%) | <0.001 |
| Haemorrhagic PED | 106 (5.2%) | 12 (2.3%) | 94 (6.2%) |  |
| No PED | 103 (5.1%) | 16 (3.1%) | 87 (5.8%) |  |
| Serous PED | 294 (14.5%) | 78 (15.1%) | 216 (14.3%) |  |
| **(S)HRM at Baseline** |  |  |  |  |
| No | 846 (41.7%) | 267 (51.5%) | 579 (38.3%) | <0.001 |
| Yes, Foveal | 85 (4.2%) | 20 (3.9%) | 65 (4.3%) |  |
| Yes, Foveal and Non-Foveal | 875 (43.1%) | 169 (32.6%) | 706 (46.8%) |  |
| Yes, Non-Foveal | 222 (10.9%) | 62 (12.0%) | 160 (10.6%) |  |
| **(S)HRM Width** |  |  |  |  |
| Mean (SD) | 880 (1000) | 590 (770) | 990 (1100) | <0.001 |
| Median (IQR) | 580 (1600) | 0 (1000) | 750 (1700) |  |
| **(S)HRM Height** |  |  |  |  |
| Mean (SD) | 100 (140) | 79 (140) | 110 (140) | <0.001 |
| Median (IQR) | 92 (160) | 0 (140) | 100 (170) |  |
| **IRF at Baseline** |  |  |  |  |
| Yes | 1030 (50.8%) | 179 (34.6%) | 851 (56.4%) | <0.001 |
| No | 998 (49.2%) | 339 (65.4%) | 659 (43.6%) |  |
| **SRF at Baseline** |  |  |  |  |
| Yes | 1683 (83.0%) | 457 (88.2%) | 1226 (81.2%) | <0.001 |
| No | 345 (17.0%) | 61 (11.8%) | 284 (18.8%) |  |
| **EZ-loss at Baseline** |  |  |  |  |
| No | 590 (29.1%) | 252 (48.6%) | 338 (22.4%) | <0.001 |
| Ungradable | 845 (41.7%) | 214 (41.3%) | 631 (41.8%) |  |
| Yes, Fovea-involving | 381 (18.8%) | 25 (4.8%) | 356 (23.6%) |  |
| Yes, Not Fovea-involving | 212 (10.5%) | 27 (5.2%) | 185 (12.3%) |  |
| **ELM-loss at Baseline** |  |  |  |  |
| No | 587 (28.9%) | 252 (48.6%) | 335 (22.2%) | <0.001 |
| Ungradable | 857 (42.3%) | 214 (41.3%) | 643 (42.6%) |  |
| Yes, Fovea-involving | 373 (18.4%) | 25 (4.8%) | 348 (23.0%) |  |
| Yes, Not Fovea-involving | 211 (10.4%) | 27 (5.2%) | 184 (12.2%) |  |
| **wdHRM at Baseline** |  |  |  |  |
| Yes | 294 (14.5%) | 19 (3.7%) | 275 (18.2%) | <0.001 |
| No | 1734 (85.5%) | 499 (96.3%) | 1235 (81.8%) |  |
| **wdHRM at Visit 4** |  |  |  |  |
| Yes | 428 (21.1%) | 19 (3.7%) | 409 (27.1%) | <0.001 |
| No | 1600 (78.9%) | 499 (96.3%) | 1101 (72.9%) |  |

wdHRM= Well-delineated hyperreflective material; BCVA = Best-corrected visual acuity; PED = Pigment epithelium detachment; (S)HRM = (Subretinal) hyperreflective material; IRF = Intraretinal Fluid; SRF = Subretinal fluid; EZ = Ellipsoid Zone; External limiting membrane = ELM; HTM = Hypertransmission
