# Supplementary material for: Macular Neovascularization Subtype Determines Visual Consequences of Early Fibro-atrophic Remodelling in Neovascular AMD: PRECISE Study Report 11
Source: Research Square preprint supplement (doi:10.21203/rs.3.rs-8575526/v1), 2026-02-03
Supplement: Supplementary file 2 [file 1a4b1d8d049d6929e0b96f45.docx]

|  | Overall (N=2028) | wdHRM at Visit 4 (N=428) | No wdHRM at Visit 4 (N=1600) | wdHRM vs No wdHRM at Visit 4 |
| --- | --- | --- | --- | --- |
| **wdHRM at Baseline** |  |  |  |  |
| Yes | 294 (14.5%) | 149 (34.8%) | 145 (9.1%) | <0.001 |
| No | 1734 (85.5%) | 279 (65.2%) | 1455 (90.9%) |  |
| **BCVA at Baseline** |  |  |  |  |
| Mean (SD) | 58 (15) | 52 (15) | 60 (14) | <0.001 |
| Median (IQR) | 60 (21) | 53 (22) | 62 (19) |  |
| **BCVA at Visit 4** |  |  |  |  |
| Mean (SD) | 63 (15) | 56 (17) | 64 (14) | <0.001 |
| Median (IQR) | 66 (19) | 59 (24) | 68 (16) |  |
| **PED at Baseline** |  |  |  |  |
| Fibrovascular PED | 1525 (75.2%) | 316 (73.8%) | 1209 (75.6%) | <0.001 |
| Haemorrhagic PED | 106 (5.2%) | 33 (7.7%) | 73 (4.6%) |  |
| No PED | 103 (5.1%) | 35 (8.2%) | 68 (4.3%) |  |
| Serous PED | 294 (14.5%) | 44 (10.3%) | 250 (15.6%) |  |
| **(S)HRM at Baseline** |  |  |  |  |
| No | 846 (41.7%) | 139 (32.5%) | 707 (44.2%) | <0.001 |
| Yes, Foveal | 85 (4.2%) | 15 (3.5%) | 70 (4.4%) |  |
| Yes, Foveal and Non-Foveal | 875 (43.1%) | 225 (52.6%) | 650 (40.6%) |  |
| Yes, Non-Foveal | 222 (10.9%) | 49 (11.4%) | 173 (10.8%) |  |
| **(S)HRM Width** |  |  |  |  |
| Mean (SD) | 880 (1000) | 1200 (1200) | 810 (960) | <0.001 |
| Median (IQR) | 580 (1600) | 1000 (2000) | 510 (1400) |  |
| **(S)HRM Height** |  |  |  |  |
| Mean (SD) | 100 (140) | 130 (190) | 91 (120) | <0.001 |
| Median (IQR) | 92 (160) | 120 (190) | 82 (150) |  |
| **IRF at Baseline** |  |  |  |  |
| Yes | 1030 (50.8%) | 277 (64.7%) | 753 (47.1%) | <0.001 |
| No | 998 (49.2%) | 151 (35.3%) | 847 (52.9%) |  |
| **SRF at Baseline** |  |  |  |  |
| Yes | 1683 (83.0%) | 364 (85.0%) | 1319 (82.4%) | 0.229 |
| No | 345 (17.0%) | 64 (15.0%) | 281 (17.6%) |  |
| **IRF at Visit 4** |  |  |  |  |
| Yes | 438 (21.6%) | 119 (27.8%) | 319 (19.9%) | <0.001 |
| No | 1590 (78.4%) | 309 (72.2%) | 1281 (80.1%) |  |
| **SRF at Visit 4** |  |  |  |  |
| Yes | 762 (37.6%) | 128 (29.9%) | 634 (39.6%) | <0.001 |
| No | 1266 (62.4%) | 300 (70.1%) | 966 (60.4%) |  |
| **“Dry” at Visit 4** |  |  |  |  |
| Yes | 1010 (49.8%) | 226 (52.8%) | 784 (49.0%) | 0.179 |
| No | 1018 (50.2%) | 202 (47.2%) | 816 (51.0%) |  |
| **EZ -loss at Baseline** |  |  |  |  |
| No | 590 (29.1%) | 65 (15.2%) | 525 (32.8%) | <0.001 |
| Ungradable | 845 (41.7%) | 173 (40.4%) | 672 (42.0%) |  |
| Yes, Fovea-involving | 381 (18.8%) | 146 (34.1%) | 235 (14.7%) |  |
| Yes, Not Fovea-involving | 212 (10.5%) | 44 (10.3%) | 168 (10.5%) |  |
| **ELM-loss at Baseline** |  |  |  |  |
| No | 587 (28.9%) | 65 (15.2%) | 522 (32.6%) | <0.001 |
| Ungradable | 857 (42.3%) | 173 (40.4%) | 684 (42.8%) |  |
| Yes, Fovea-involving | 373 (18.4%) | 146 (34.1%) | 227 (14.2%) |  |
| Yes, Not Fovea-involving | 211 (10.4%) | 44 (10.3%) | 167 (10.4%) |  |
| **HTM at Baseline** |  |  |  |  |
| No | 1598 (78.8%) | 326 (76.2%) | 1272 (79.5%) | 0.152 |
| Yes | 430 (21.2%) | 102 (23.8%) | 328 (20.5%) |  |
| **HTM at Visit 4** |  |  |  |  |
| No | 518 (25.5%) | 19 (4.4%) | 499 (31.2%) | <0.001 |
| Yes | 1510 (74.5%) | 409 (95.6%) | 1101 (68.8%) |  |

wdHRM= Well-delineated hyperreflective material; BCVA = Best-corrected visual acuity; PED = Pigment epithelium detachment; (S)HRM = (Subretinal) hyperreflective material; IRF = Intraretinal Fluid; SRF = Subretinal fluid; EZ = Ellipsoid Zone; External limiting membrane = ELM; HTM = Hypertransmission
