# Supplementary material for: Macular Neovascularization Subtype Determines Visual Consequences of Early Fibro-atrophic Remodelling in Neovascular AMD: PRECISE Study Report 11
Source: Research Square preprint supplement (doi:10.21203/rs.3.rs-8575526/v1), 2026-02-03
Supplement: Supplementary file 3 [file 58edac4af6610ae4059bbed9.docx]

|  | Overall (N=2036) |
| --- | --- |
| **Gender** |  |
| Female | 1237 (60.8%) |
| Male | 799 (39.2%) |
| **Age at Baseline (years)** |  |
| Mean (SD) | 79.4 (7.76) |
| Median [Min, Max] | 80.0 [50.0, 99.0] |
| **Ethnicity** |  |
| Asian | 25 (1.2%) |
| Black, African/Caribbean | 12 (0.6%) |
| Other | 59 (2.9%) |
| Caucasian | 1940 (95.3%) |
| **BCVA at Baseline** |  |
| Mean (SD) | 58.0 (14.5) |
| Median [Min, Max] | 60.0 [0, 94.0] |
| **BCVA at Visit 4** |  |
| Mean (SD) | 62.6 (15.2) |
| Median [Min, Max] | 66.0 [0, 95.0] |
| **PED at Baseline** |  |
| Fibrovascular PED | 1533 (75.3%) |
| Haemorrhagic PED | 106 (5.2%) |
| No PED | 103 (5.1%) |
| Serous PED | 294 (14.4%) |

BCVA = Best-corrected visual acuity; PED = Pigment epithelium detachment
