# Supplementary material for: Macular Neovascularization Subtype Determines Visual Consequences of Early Fibro-atrophic Remodelling in Neovascular AMD: PRECISE Study Report 11
Source: Research Square preprint supplement (doi:10.21203/rs.3.rs-8575526/v1), 2026-02-03
Supplement: Supplementary file 4 [file ab10efbe3834bf5fa4488858.docx]

|  | PCV (N=128) | Type 1 (N=799) | Type 2/Mixed Type (N=667) | Type 3 (N=442) | Overall (N=2036) |
| --- | --- | --- | --- | --- | --- |
| **BCVA at Baseline** |  |  |  |  |  |
| Mean (SD) | 53.0 (14.9) | 61.6 (13.2) | 55.6 (15.0) | 56.6 (14.5) | 58.0 (14.5) |
| Median [Min, Max] | 54.0 [5.00, 83.0] | 65.0 [0, 94.0] | 58.0 [0, 87.0] | 59.0 [0, 89.0] | 60.0 [0, 94.0] |
| **BCVA at Visit 4** |  |  |  |  |  |
| Mean (SD) | 56.5 (17.4) | 65.3 (13.8) | 61.1 (15.5) | 61.6 (15.8) | 62.6 (15.2) |
| Median [Min, Max] | 58.5 [0, 86.0] | 69.0 [0, 95.0] | 65.0 [3.00, 87.0] | 66.0 [0, 87.0] | 66.0 [0, 95.0] |
| **wdHRM at baseline** |  |  |  |  |  |
| Yes | 19 (14.8%) | 71 (8.9%) | 154 (23.1%) | 54 (12.2%) | 298 (14.6%) |
| No | 109 (85.2%) | 728 (91.1%) | 513 (76.9%) | 388 (87.8%) | 1738 (85.4%) |
| **wdHRM at Visit 4** |  |  |  |  |  |
| Yes | 39 (30.5%) | 120 (15.0%) | 183 (27.4%) | 86 (19.5%) | 428 (21.0%) |
| No | 88 (68.8%) | 679 (85.0%) | 478 (71.7%) | 355 (80.3%) | 1600 (78.6%) |
| Missing | 1 (0.8%) | 0 (0%) | 6 (0.9%) | 1 (0.2%) | 8 (0.4%) |
| **Atrophy (HTM) at baseline** |  |  |  |  |  |
| No | 102 (79.7%) | 652 (81.6%) | 582 (87.3%) | 270 (61.1%) | 1606 (78.9%) |
| Yes | 26 (20.3%) | 147 (18.4%) | 85 (12.7%) | 172 (38.9%) | 430 (21.1%) |
| **Atrophy (HTM) at Visit 4** |  |  |  |  |  |
| No | 19 (14.8%) | 277 (34.7%) | 152 (22.8%) | 70 (15.8%) | 518 (25.4%) |
| Yes | 108 (84.4%) | 522 (65.3%) | 509 (76.3%) | 371 (83.9%) | 1510 (74.2%) |
| Missing | 1 (0.8%) | 0 (0%) | 6 (0.9%) | 1 (0.2%) | 8 (0.4%) |
| **(S)HRM at Baseline** |  |  |  |  |  |
| No | 39 (30.5%) | 538 (67.3%) | 38 (5.7%) | 234 (52.9%) | 849 (41.7%) |
| Yes, Foveal | 4 (3.1%) | 27 (3.4%) | 35 (5.2%) | 19 (4.3%) | 85 (4.2%) |
| Yes, Foveal and Non-Foveal | 64 (50.0%) | 180 (22.5%) | 487 (73.0%) | 148 (33.5%) | 879 (43.2%) |
| Yes, Non-Foveal | 21 (16.4%) | 54 (6.8%) | 107 (16.0%) | 41 (9.3%) | 223 (11.0%) |
| **(S)HRM Width** |  |  |  |  |  |
| Mean (SD) | 1460 (1430) | 449 (780) | 1460 (921) | 636 (881) | 885 (1010) |
| Median [Min, Max] | 1160 [0, 4690] | 0 [0, 5070] | 1360 [0, 5300] | 0 [0, 4640] | 584 [0, 5300] |
| **(S)HRM Height** |  |  |  |  |  |
| Mean (SD) | 165 (199) | 48.5 (83.3) | 170 (167) | 68.9 (87.4) | 99.9 (138) |
| Median [Min, Max] | 147 [0, 1680] | 0 [0, 599] | 148 [0, 2830] | 0 [0, 456] | 92.0 [0, 2830] |
| **IRF at Baseline** |  |  |  |  |  |
| Yes | 54 (42.2%) | 229 (28.7%) | 313 (46.9%) | 439 (99.3%) | 1035 (50.8%) |
| No | 74 (57.8%) | 570 (71.3%) | 354 (53.1%) | 3 (0.7%) | 1001 (49.2%) |
| **IRF at Visit 4** |  |  |  |  |  |
| Yes | 36 (28.1%) | 115 (14.4%) | 157 (23.5%) | 134 (30.3%) | 442 (21.7%) |
| No | 92 (71.9%) | 684 (85.6%) | 510 (76.5%) | 308 (69.7%) | 1594 (78.3%) |
| **SRF at Baseline** |  |  |  |  |  |
| Yes | 127 (99.2%) | 744 (93.1%) | 613 (91.9%) | 206 (46.6%) | 1690 (83.0%) |
| No | 1 (0.8%) | 55 (6.9%) | 54 (8.1%) | 236 (53.4%) | 346 (17.0%) |
| **SRF at Visit 4** |  |  |  |  |  |
| Yes | 64 (50.0%) | 389 (48.7%) | 263 (39.4%) | 50 (11.3%) | 766 (37.6%) |
| No | 64 (50.0%) | 410 (51.3%) | 404 (60.6%) | 392 (88.7%) | 1270 (62.4%) |
| **“Dry” at Visit 4** |  |  |  |  |  |
| “Dry” | 48 (37.5%) | 352 (44.1%) | 320 (48.0%) | 292 (66.1%) | 1012 (49.7%) |
| Not “dry” | 80 (62.5%) | 447 (55.9%) | 347 (52.0%) | 150 (33.9%) | 1024 (50.3%) |

BCVA = Best-corrected visual acuity; PED = Pigment epithelium detachment; (S)HRM = (Subretinal) hyperreflective material; IRF = Intraretinal Fluid; SRF = Subretinal fluid; EZ = Ellipsoid Zone; External limiting membrane = ELM; HTM = Hypertransmission
